# Supplementary material for: In simulated data and health records, latent class analysis was the optimum multimorbidity clustering algorithm
Source: PubMed Central journal article supplement (PMC7613854; doi:10.1016/j.jclinepi.2022.10.011), 2022-10-11
Supplement: EMS157097-supplement-Supplementary_File_1.pdf [file EMS157097-supplement-Supplementary_File_1.pdf]

## Patient allocation to disease clusters

Let the patient numbered  $i$  be denoted  $P_i$ . For the imbalanced scenario with  $K$  clusters, the (un-normalized) weighting for patient  $i$  being allocated to disease group  $k$ ,  $w_k^i$  is uniform over the patients and distributed exponentially over the clusters:

$$Pr(w_k = x) \sim exp(-x)$$

The patient is allocated to disease group  $k$  with probability

$$Pr(P_i(G = k)) = w_k / \sum_{j=1}^K w_j$$

For the balanced scenario, the probability of allocation to any disease cluster is equal to  $1/K$ :

$$Pr(P_i(G = k)) = 1/K$$

## Disease allocation to disease clusters

Let the disease cluster with number  $k$  be denoted  $DC_k$  and numbered 1 through  $K$ . Let the  $k$ 'th disease cluster  $DC_k$  denote  $n_k$  diseases  $(d_1, \dots, d_{n_k})$ .

The number of diseases allocated to disease cluster  $k$ ,  $n_k$  is Poisson distributed, with floor set to 2 and rate  $\lambda$  equal to 5.0:

$$Pr(n_k = m) \sim \mathbb{1}_{m \geq 2} Pn(\lambda; m) \text{ (up to normalization)}$$

and for each cluster  $k$ , the  $n_k$  diseases  $d_1, \dots, d_{n_k}$  are drawn with uniform probability, without replacement, from  $N_D$  diseases  $D_1, \dots, D_N$  (numbered 1 through 25). For disease cluster  $k$ ,  $DC_k$ , with  $n_k$  diseases in cluster  $k$ :

$$Pr(DC_k(d_1 = D_{i_1}, \dots, d_{n_k} = D_{i_{n_k}}); i_1 < \dots < i_{n_k}, i_{n_k} \leq N) = n_k!(N - n_k)!/N! = 1/\binom{N}{n_k}$$

## Simulation of disease presence and absence from clusters

Let the observed presence or absence of disease  $d$  in patient  $i$  be denoted  $Y_i^d$  (0,1). We model the relationship between simulated disease presence and absence for patient  $i$  allocated to  $k$ 'th disease group  $DC_k$ , as a multinomial probit:

$$Pr(Y_i^{sim, DC_k} = 1 | X^{DC_k}) \sim \Phi(X^{DC_k}, \Omega^{DC_k})$$

where  $\Phi$  is the standard multivariate normal and  $X^{DC_k}, \Omega^{DC_k}$  are a  $(n_k)$  dimensional latent variable and  $n_k \times n_k$  latent correlation matrix controlling the disease indicators. The value of the latent probit mean for disease group  $k$ ,  $X^{DC_k}$  is set at a uniform value (-0.70).

As we might expect some correlation structure within a disease group, we set all off-diagonal correlations within  $\Omega^{DC_k}$  to some uniform positive value  $0 \leq \rho \leq 0.7$ , which we can vary.

## Addition of background noise to observations

We model the presence of uncorrelated background noise which could contaminate our cluster observations by adding a background value via an uncorrelated latent probit mean for the  $N_D$  diseases in the  $N_P \times D$  dimensional observation matrix  $Y$ . This is done by adding a latent value of the noise floor  $M$ , set to a uniform value over all disease for simplicity:

$$Pr(Y_i^{spurious,d} = 1) \sim \Phi(M^{N_D})$$

$$Y_i^{obs,d} = \max(Y_i^{spurious,d}, Y_i^{sim,d})$$

In [ ]:
